# Supplementary material
Source: publisher figshare collection journal article supplement (https://gsajournals.figshare.com/ndownloader/files/21805032)
Supplement: Supplementary file 1 [file 21805032]

## Sheet: Oxygen Omnibus.f
term	sumsq	meansq	df	statistic	p.value	etasq	partial.etasq	omegasq	partial.omegasq	epsilonsq	cohens.f	power
(Intercept)	170.19	170.19	1	11614.3	0	0.97433	0.97876	0.97416	0.97802	0.97425	6.78886	1
Genotype	0.00371	0.00371	1	0.25317	0.61529	2e-05	0.001	-6e-05	-0.00287	-6e-05	0.0317	0.07948
mtDNA	0.00024	0.00024	1	0.01623	0.89874	0	6e-05	-8e-05	-0.00378	-8e-05	0.00802	0.05186
Treatment	0.60305	0.60305	1	41.1546	0	0.00345	0.14039	0.00337	0.13334	0.00337	0.40412	1
Genotype:mtDNA	0.07883	0.07883	1	5.3799	0.02117	0.00045	0.0209	0.00037	0.0165	0.00037	0.14611	0.64051
Genotype:Treatment	0.04789	0.04789	1	3.26796	0.07184	0.00027	0.0128	0.00019	0.00861	0.00019	0.11388	0.43969
mtDNA:Treatment	0.00275	0.00275	1	0.18779	0.66513	2e-05	0.00074	-7e-05	-0.00312	-7e-05	0.0273	0.07178
Genotype:mtDNA:Treatment	0.05487	0.05487	1	3.74434	0.05411	0.00031	0.01464	0.00023	0.01041	0.00023	0.1219	0.49021
Residuals	3.69266	0.01465	252

## Sheet: O2 Volcano plot
ID#				Comparison	n	Shapiro test	Levene's test	Analysis	Estimator	Raw p-value	Holm p-value	Hedges' g	Hedges' g Lower	Hedges' G Upper	Magnitude
1	Standard	OreR	D. melanogaster	w1118 vs. Sirt4white+1	66	0.155	0.0905	anova	none	0.0374	0.448	0.517	0.0231	1.01	medium
2	Standard	Zim53	D. melanogaster	w1118 vs. Sirt4white+1	24	0.427	0.976	anova	none	0.485	1	0.28	-0.541	1.1	small
3	Standard	sm21	D. simulans	w1118 vs. Sirt4white+1	24	0.125	0.736	anova	none	0.36	1	-0.368	-1.19	0.456	small
4	Standard	si1	D. simulans	w1118 vs. Sirt4white+1	14	0.945	0.729	anova	none	0.0407	0.448	-1.15	-2.32	0.0288	large
5	Rapa	OreR	D. melanogaster	w1118 vs. Sirt4white+1	66	0.563	0.834	anova	none	0.42	1	0.197	-0.29	0.685	negligible
6	Rapa	Zim53	D. melanogaster	w1118 vs. Sirt4white+1	24	0.218	0.904	anova	none	0.0536	0.526	0.804	-0.046	1.65	large
7	Rapa	sm21	D. simulans	w1118 vs. Sirt4white+1	24	0.352	0.0387	anova	hc4	0.405	1	0.335	-0.489	1.16	small
8	Rapa	si1	D. simulans	w1118 vs. Sirt4white+1	18	0.0708	0.918	anova	none	0.84	1	0.0919	-0.86	1.04	negligible
9	w1118	OreR	D. melanogaster	Standard vs. Rapa	66	0.0373	0.0187	anova	hc4	1.8e-05	0.000288	1.13	0.605	1.65	large
10	w1118	Zim53	D. melanogaster	Standard vs. Rapa	24	0.175	0.945	anova	none	0.284	1	0.432	-0.395	1.26	small
11	w1118	sm21	D. simulans	Standard vs. Rapa	24	0.628	0.304	anova	none	0.405	1	0.335	-0.488	1.16	small
12	w1118	si1	D. simulans	Standard vs. Rapa	16	0.97	0.901	anova	none	0.498	1	0.332	-0.697	1.36	small
13	Sirt4white+1	OreR	D. melanogaster	Standard vs. Rapa	66	0.403	0.765	anova	none	0.00341	0.0512	0.74	0.238	1.24	medium
14	Sirt4white+1	Zim53	D. melanogaster	Standard vs. Rapa	24	0.761	0.999	anova	none	0.0526	0.526	0.808	-0.0425	1.66	large
15	Sirt4white+1	sm21	D. simulans	Standard vs. Rapa	24	0.15	0.152	anova	none	0.0237	0.307	0.958	0.0952	1.82	large
16	Sirt4white+1	si1	D. simulans	Standard vs. Rapa	16	0.857	0.664	anova	none	0.00376	0.0526	1.65	0.472	2.83	large
17	wildtype	C167.4	D. simulans	Standard vs. Rapa	59	0.207	0.174	anova	none	0.00917	0.0275	-0.693	-1.22	-0.163	medium
18	wildtype	C167.4	D. simulans	Standard vs. Starvation	58	0.838	0.685	anova	none	0.866	0.866	-0.044	-0.563	0.475	negligible
19	wildtype	C167.4	D. simulans	Rapa vs. Starvation	57	0.0396	0.291	anova	none	0.0154	0.0309	0.653	0.116	1.19	medium
20	wildtype	Zim53	D. melanogaster	Standard vs. Rapa	23	0.598	0.239	anova	none	0.000669	0.00201	1.6	0.643	2.57	large
21	wildtype	Zim53	D. melanogaster	Standard vs. Starvation	23	0.203	0.439	anova	none	0.00312	0.00624	1.34	0.417	2.27	large
22	wildtype	Zim53	D. melanogaster	Rapa vs. Starvation	24	0.0525	0.0416	anova	hc4	0.104	0.104	-0.668	-1.51	0.172	medium
23	wildtype	OreR	D. melanogaster	Standard vs. Rapa	11	0.12	0.163	anova	none	0.00884	0.0265	1.84	0.349	3.33	large
24	wildtype	OreR	D. melanogaster	Standard vs. Starvation	12	0.541	0.24	anova	none	0.0261	0.0521	1.39	0.0675	2.71	large
25	wildtype	OreR	D. melanogaster	Rapa vs. Starvation	11	0.517	0.466	anova	none	0.0812	0.0812	-1.09	-2.43	0.254	large
26	wildtype	sm21	D. simulans	Standard vs. Rapa	23	0.695	0.0525	anova	none	0.491	0.52	-0.282	-1.12	0.559	small
27	wildtype	sm21	D. simulans	Standard vs. Starvation	23	0.066	0.817	anova	none	0.26	0.52	0.466	-0.382	1.31	small
28	wildtype	sm21	D. simulans	Rapa vs. Starvation	24	0.693	0.0969	anova	none	0.039	0.117	0.865	0.0105	1.72	large
29	wildtype	si1	D. simulans	Standard vs. Rapa	12	0.559	0.89	anova	none	0.148	0.295	0.837	-0.402	2.08	large
30	wildtype	si1	D. simulans	Standard vs. Starvation	12	0.0309	0.00882	anova	hc4	0.00414	0.0124	1.97	0.522	3.42	large
31	wildtype	si1	D. simulans	Rapa vs. Starvation	12	0.362	0.0925	anova	none	0.352	0.352	0.521	-0.687	1.73	medium
32	Standard		w1118	D. melanogaster vs D. simulans	64	0.00663	0.0288	wilcoxon	none	0.205	1	0.523	-0.0246	1.07	medium
33	Standard		Sirt4white+1	D. melanogaster vs D. simulans	64	0.559	0.968	anova	none	0.0178	0.161	-0.658	-1.21	-0.105	medium
34	Rapa		w1118	D. melanogaster vs D. simulans	66	0.23	0.737	anova	none	0.718	1	0.0948	-0.427	0.617	negligible
35	Rapa		Sirt4white+1	D. melanogaster vs D. simulans	66	0.148	0.119	anova	none	0.971	1	-0.00939	-0.531	0.512	negligible
36	w1118		D. melanogaster	Standard vs. Rapa	90	0.0138	0.0516	anova	none	2.51e-05	0.000302	0.93	0.493	1.37	large
37	w1118		D. simulans	Standard vs. Rapa	40	0.605	0.347	anova	none	0.242	1	0.369	-0.265	1	small
38	Sirt4white+1		D. melanogaster	Standard vs. Rapa	90	0.337	0.745	anova	none	0.000432	0.00432	0.765	0.334	1.19	medium
39	Sirt4white+1		D. simulans	Standard vs. Rapa	40	0.315	0.075	anova	none	0.000212	0.00234	1.27	0.582	1.96	large
40	Standard		D. melanogaster	w1118 vs. Sirt4white+1	90	0.628	0.186	anova	none	0.0388	0.31	0.438	0.0182	0.859	small
41	Standard		D. simulans	w1118 vs. Sirt4white+1	38	0.432	0.31	anova	none	0.0406	0.31	-0.675	-1.34	-0.0125	medium
42	Rapa		D. melanogaster	w1118 vs. Sirt4white+1	90	0.386	0.959	anova	none	0.0898	0.539	0.358	-0.0602	0.777	small
43	Rapa		D. simulans	w1118 vs. Sirt4white+1	42	0.103	0.0999	anova	none	0.459	1	0.226	-0.387	0.84	small
